# Supplementary material for: A mechanically tough and ultra-swellable microneedle for acute gout arthritis
Source: Royal Society of Chemistry journal article supplement (doi:10.1039/d2bm01937j), 2022-12-08
Supplement: d2bm01937j1.pdf [file d2bm01937j1.pdf]

## Electronic Supplementary Information

### A mechanically tough and ultra-swellable microneedle for acute gouty arthritis

*Suping Jiang<sup>#</sup>, Wen Wang<sup>#</sup>, Jiming Ke<sup>#</sup>, Shan Huang, Jie Wang, Chengxi Luo, Xiaoxia Li, Kaili Zhang, Huanhuan Liu\*, Wensheng Zheng\*, Jiwen Zhang\*, Can Peng\**

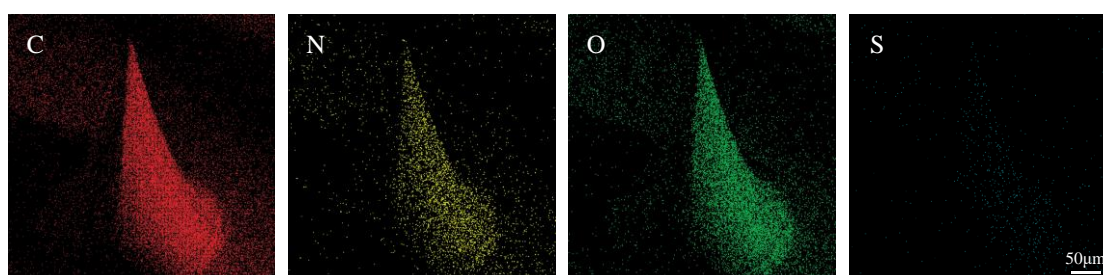

Fig. S1 The element mappings of the HMNs.

Table S1 HMNs samples of different contents.

| Sample | AM (wt%) | BACA (wt‰) | Irgacure 2959 (wt‰) |
|--------|----------|------------|---------------------|
| H1     | 8.33     | 1.67       | 1.67                |
| H2     | 16.67    | 1.67       | 1.67                |
| H3     | 33.33    | 1.67       | 1.67                |
| H4     | 16.67    | 1.67       | 8.33                |
| H5     | 16.67    | 3.33       | 8.33                |
| H6     | 16.67    | 6.67       | 8.33                |
| H7     | 16.67    | 3.33       | 1.67                |
| H8     | 16.67    | 3.33       | 8.33                |
| H9     | 16.67    | 3.33       | 16.67               |



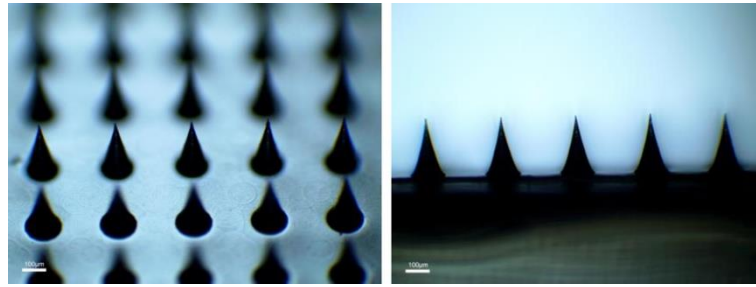

Fig. S5 Microscopic images of Col-HMNs. scale bar: 100  $\mu\text{m}$ .

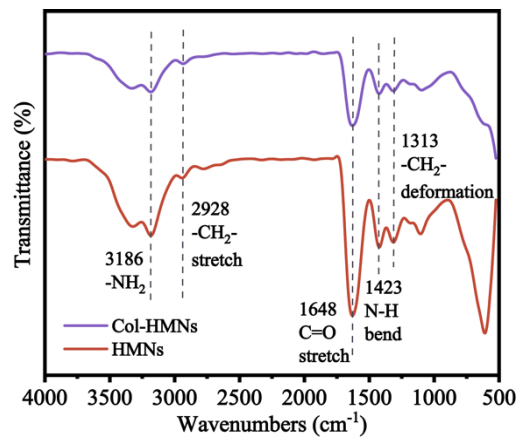

Fig. S6 FTIR spectra of HMN and Col-HMNs.

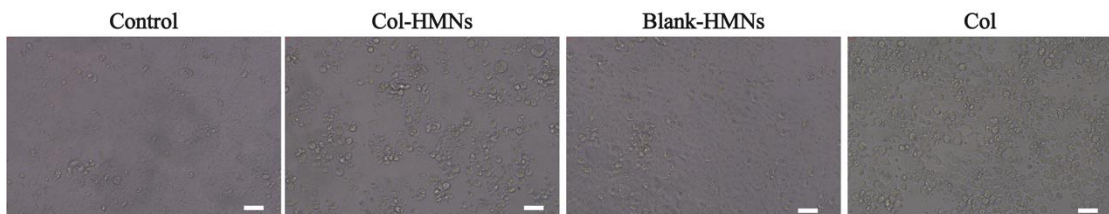

Fig. S7 Microscopic images of different groups of cells in cytotoxicity experiments; scale bar: 200  $\mu\text{m}$ .

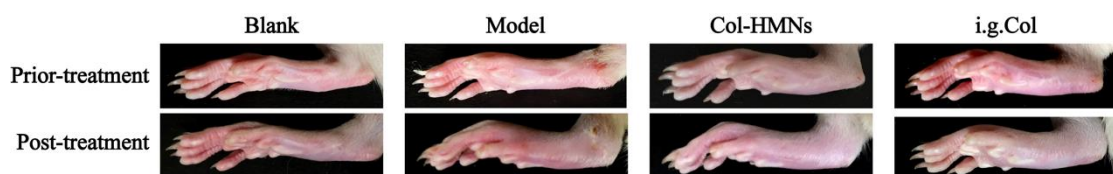

Fig. S8 Feet images of rats treated with Col-HMNs and i.g. Col.
